# Supplementary material
Source: MDPI journal article supplement (https://www.mdpi.com/2073-4344/13/6/1015)
Supplement: s1 [file s1]

## Supplementary Materials

# Tungsten Oxide Morphology-Dependent Au/TiO<sub>2</sub>/WO<sub>3</sub> Heterostructures with Applications in Heterogenous Photocatalysis and Surface-Enhanced Raman Spectroscopy

István Székely <sup>1,2,3</sup>, Zoltán Kovács <sup>1,2,4</sup>, Mihai Rusu <sup>2,5</sup>, Tamás Gyulavári <sup>4</sup>, Milica Todea <sup>2,6</sup>, Monica Focșan <sup>7</sup>, Monica Baia <sup>2,3,8,\*</sup> and Zsolt Pap <sup>2,3,4,\*</sup>

- <sup>1</sup> Doctoral School of Physics, Babes-Bolyai University, M. Kogălniceanu 1, 400084 Cluj-Napoca, Romania; istvan.szekely@ubbcluj.ro (I.S.); zoltan.kovacs@ubbcluj.ro (Z.K.)
  - <sup>2</sup> Centre of Nanostructured Materials and Bio-Nano Interfaces, Institute for Interdisciplinary Research on Bio-Nano-Sciences, Treboniu Laurian 42, 400271 Cluj-Napoca, Romania; mihai.rusu@phys.utcluj.ro (M.R.)
  - <sup>3</sup> Laboratory for Advanced Materials and Applied Technologies, Institute for Research, Development and Innovation in Applied Natural Sciences, Fantanele 30, 400294 Cluj-Napoca, Romania
  - <sup>4</sup> Department of Applied and Environmental Chemistry, University of Szeged, Rerrich Sqr. 1, HU-6720 Szeged, Hungary; gyulavarit@chem.u-szeged.hu
  - <sup>5</sup> Department of Physics and Chemistry, Technical University of Cluj-Napoca, Memorandumului 28, 400114 Cluj-Napoca, Romania
  - <sup>6</sup> Faculty of Medicine, Iuliu Hațieganu University of Medicine and Pharmacy, Victor Babeș 8, 400012 Cluj-Napoca, Romania
  - <sup>7</sup> Nanobiophotonics and Laser Microspectroscopy Center, Interdisciplinary Research Institute on Bio-Nano-Sciences, Treboniu Laurian 42, Babes-Bolyai University, 400271 Cluj-Napoca, Romania; monica.iosin@ubbcluj.ro
  - <sup>8</sup> Faculty of Physics, Babeș-Bolyai University, Mihail Kogălniceanu Str. 1, 400084 Cluj-Napoca, Romania
- \* Correspondence: monica.baia@ubbcluj.ro (M.B.); zsolt.pap@ubbcluj.ro (Z.P.)

**Citation:** Székely, I.; Kovács, Z.; Rusu, M.; Gyulavári, T.; Todea, M.; Focșan, M.; Baia, M.; Pap, Z. Tungsten Oxide Morphology-Dependent Au/TiO<sub>2</sub>/WO<sub>3</sub> Heterostructures with Applications in Heterogenous Photocatalysis and Surface-Enhanced Raman Spectroscopy. *Catalysts* **2023**, *13*, x. <https://doi.org/10.3390/xxxxx>

Academic Editors: Detlef W. Bahnemann and Jorge Bedia

Received: 29 March 2023

Revised: 12 June 2023

Accepted: 15 June 2023

Published: date

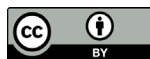

**Copyright:** © 2023 by the authors.  
Licensee MDPI, Basel, Switzerland.  
This article is an open access article distributed under the terms and conditions of the Creative Commons Attribution (CC BY) license (<https://creativecommons.org/licenses/by/4.0/>).

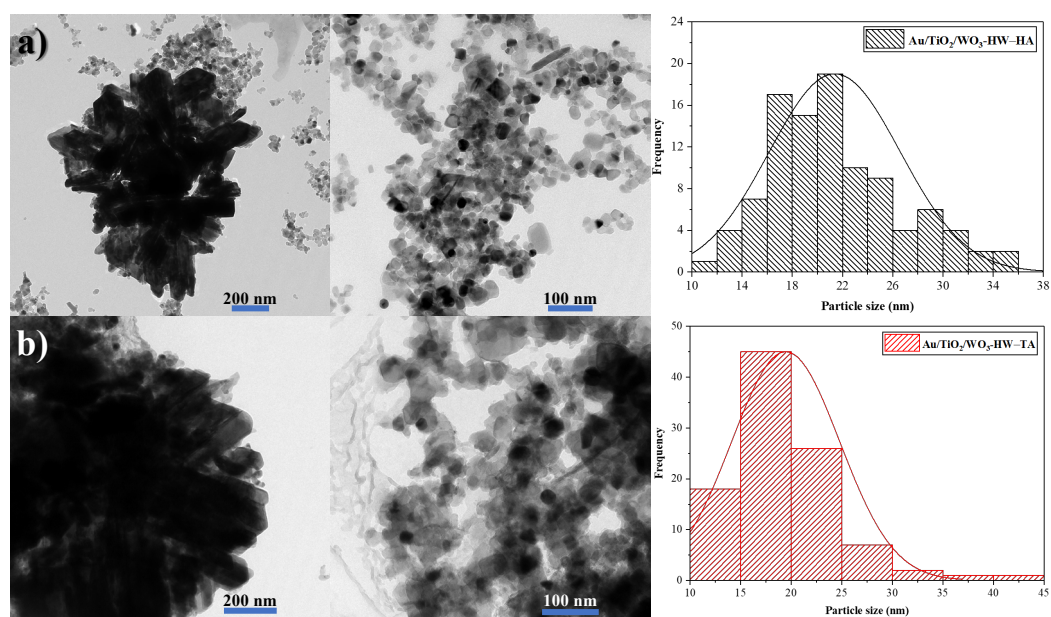

**Figure S1.** TEM micrographs of Au/TiO<sub>2</sub>/WO<sub>3</sub>-HW-HA (a) and Au/TiO<sub>2</sub>/WO<sub>3</sub>-HW-TA (b) samples, and their corresponding size distribution histograms for gold nanoparticles.

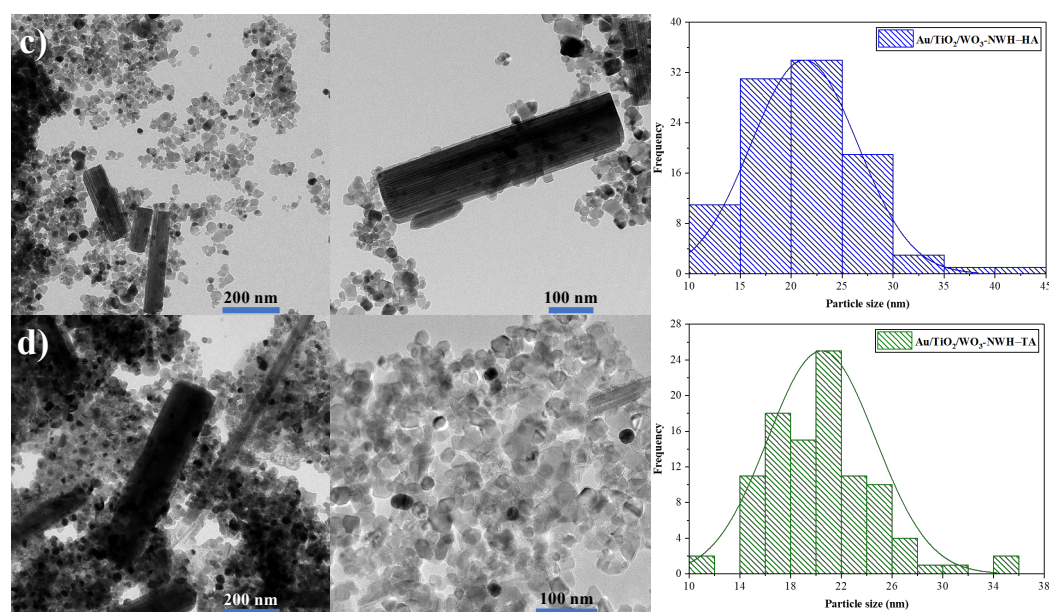

**Figure S2.** TEM micrographs of Au/TiO<sub>2</sub>/WO<sub>3</sub>-NWH-HA (c) and Au/TiO<sub>2</sub>/WO<sub>3</sub>-NWH-TA (d), and their corresponding size distribution histograms for gold nanoparticles.

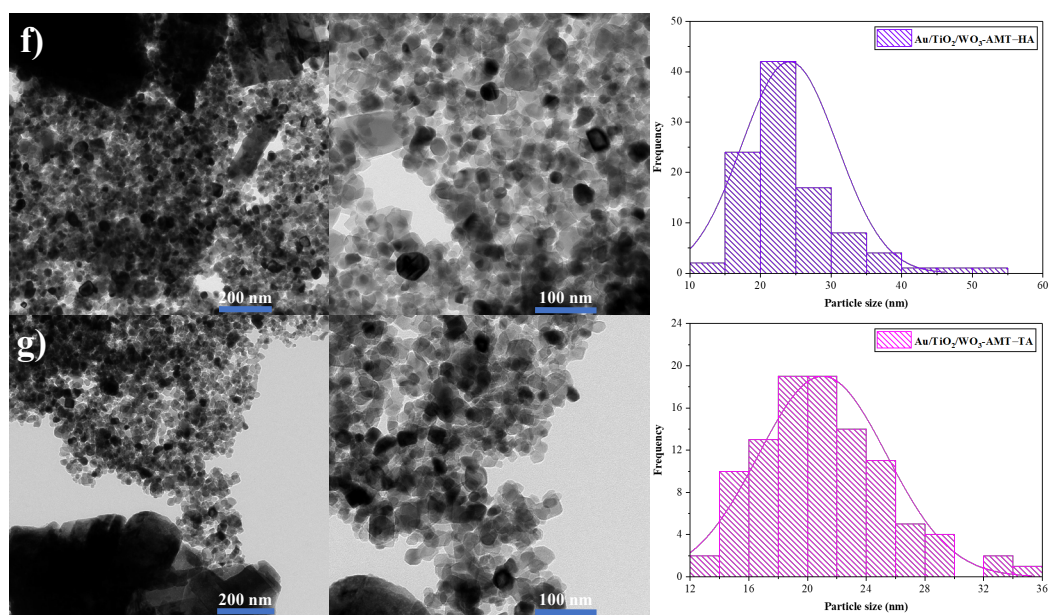

**Figure S3.** TEM micrographs of Au/TiO<sub>2</sub>/WO<sub>3</sub>-AMT-HA (f) and Au/TiO<sub>2</sub>/WO<sub>3</sub>-AMT-TA (g), and their corresponding size distribution histograms for gold nanoparticles.



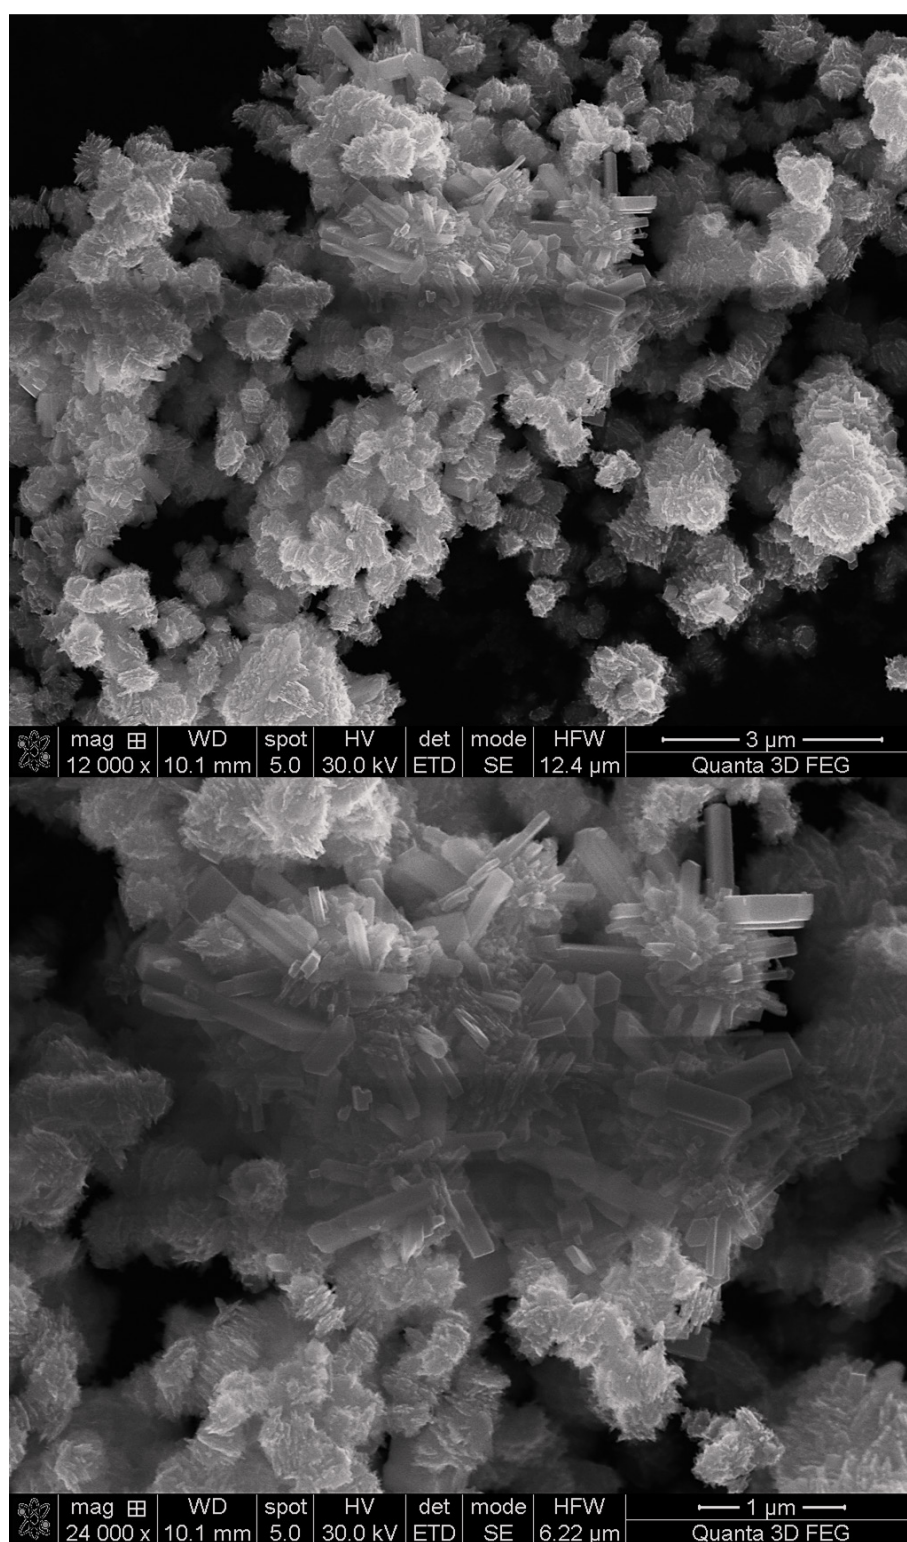

**Figure S4.** SEM micrographs of the prismatic dipyr amid  $\text{WO}_3$ -HW semiconductors (3–1  $\mu\text{m}$ ).

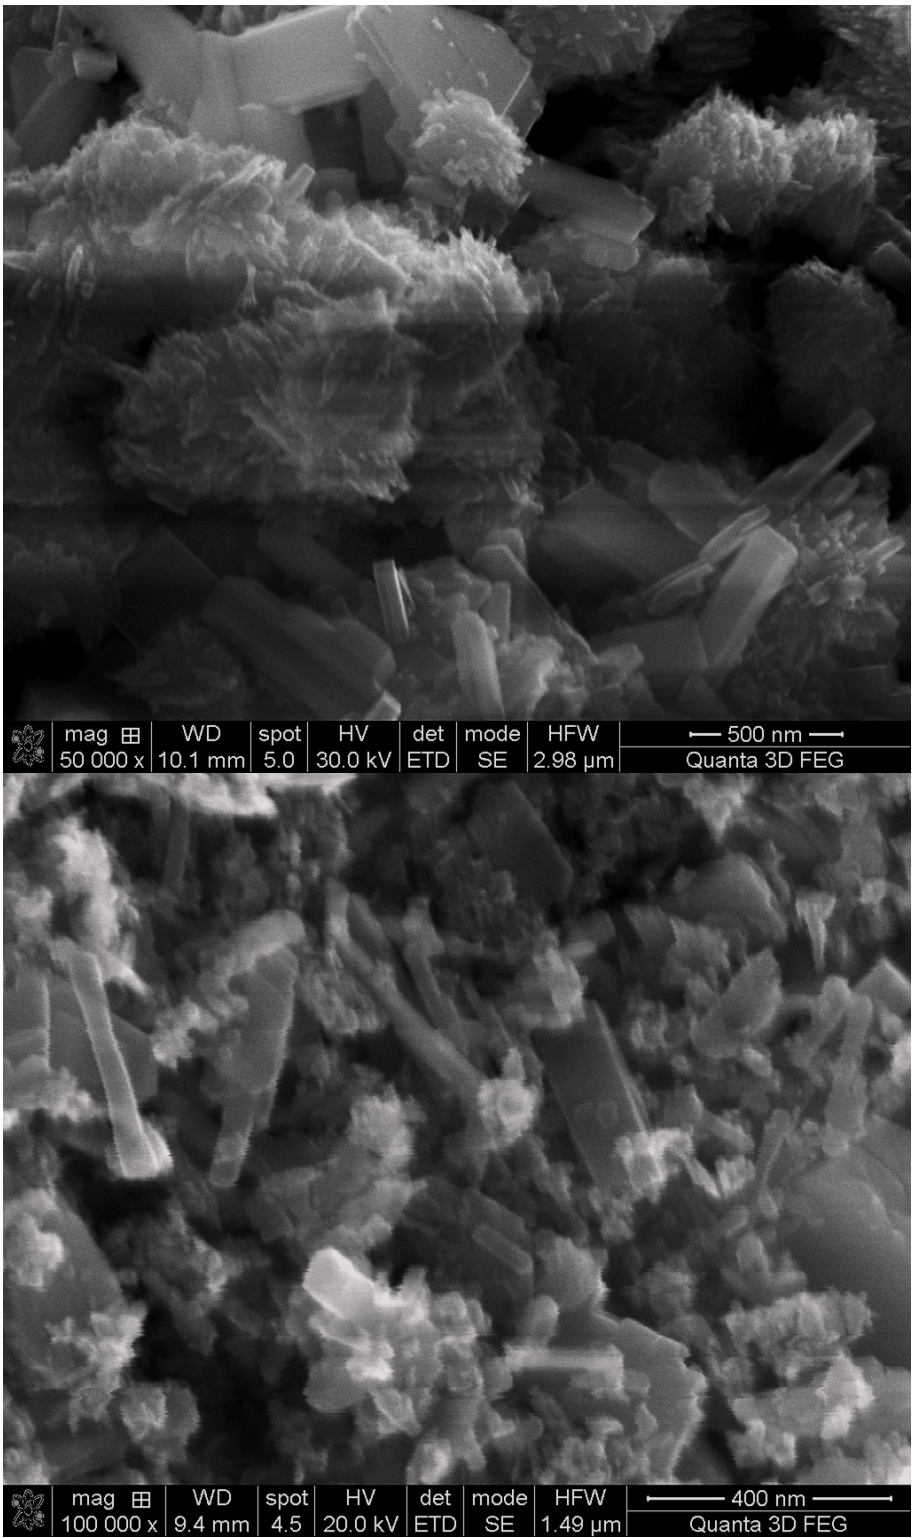

**Figure S5.** SEM micrographs of the prismatic dipyr amid  $\text{WO}_3$ -HW semiconductors (500–400 nm).



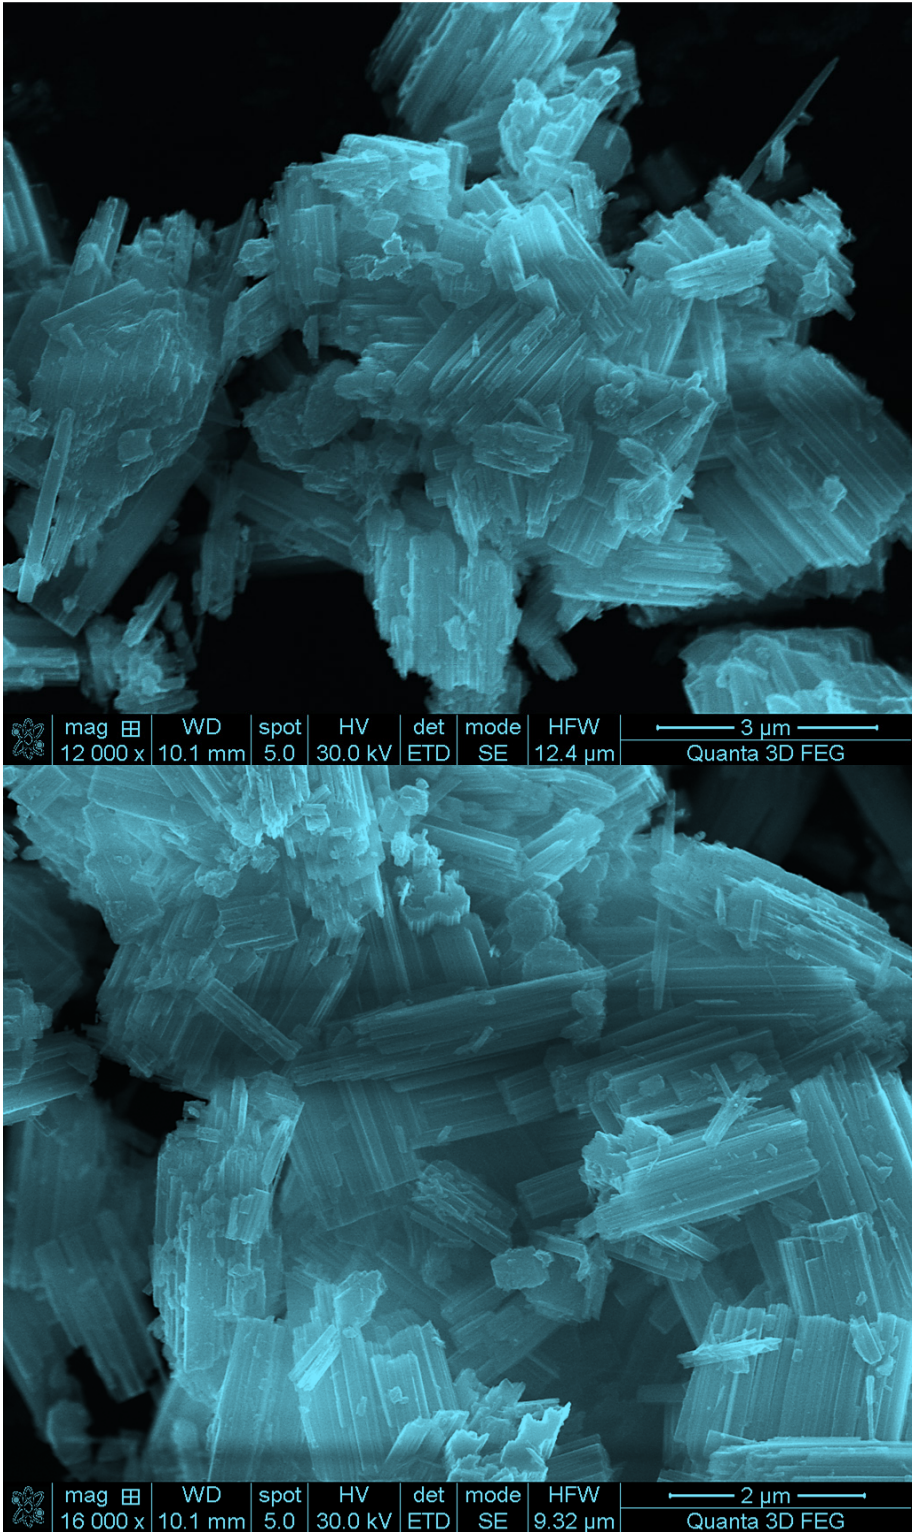

**Figure S6.** SEM micrographs of the rod-like/wire-like  $\text{WO}_3$ -NWH semiconductors (3–2  $\mu\text{m}$ ).

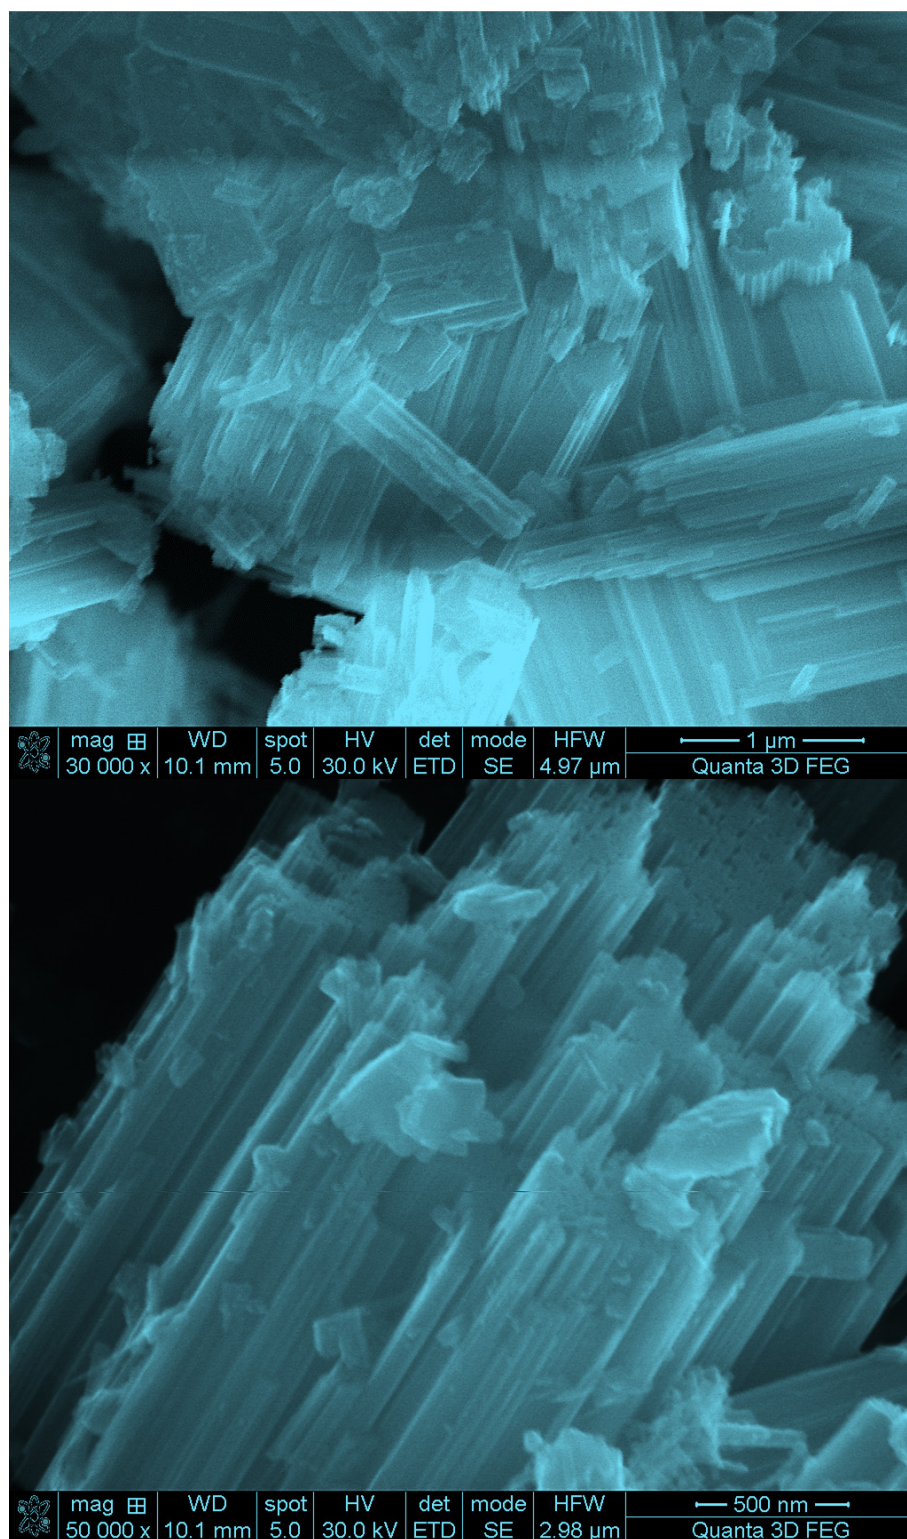

**Figure S7.** SEM micrographs of the rod-like/wire-like  $\text{WO}_3$ -NWH semiconductors (1–0.5  $\mu\text{m}$ ).



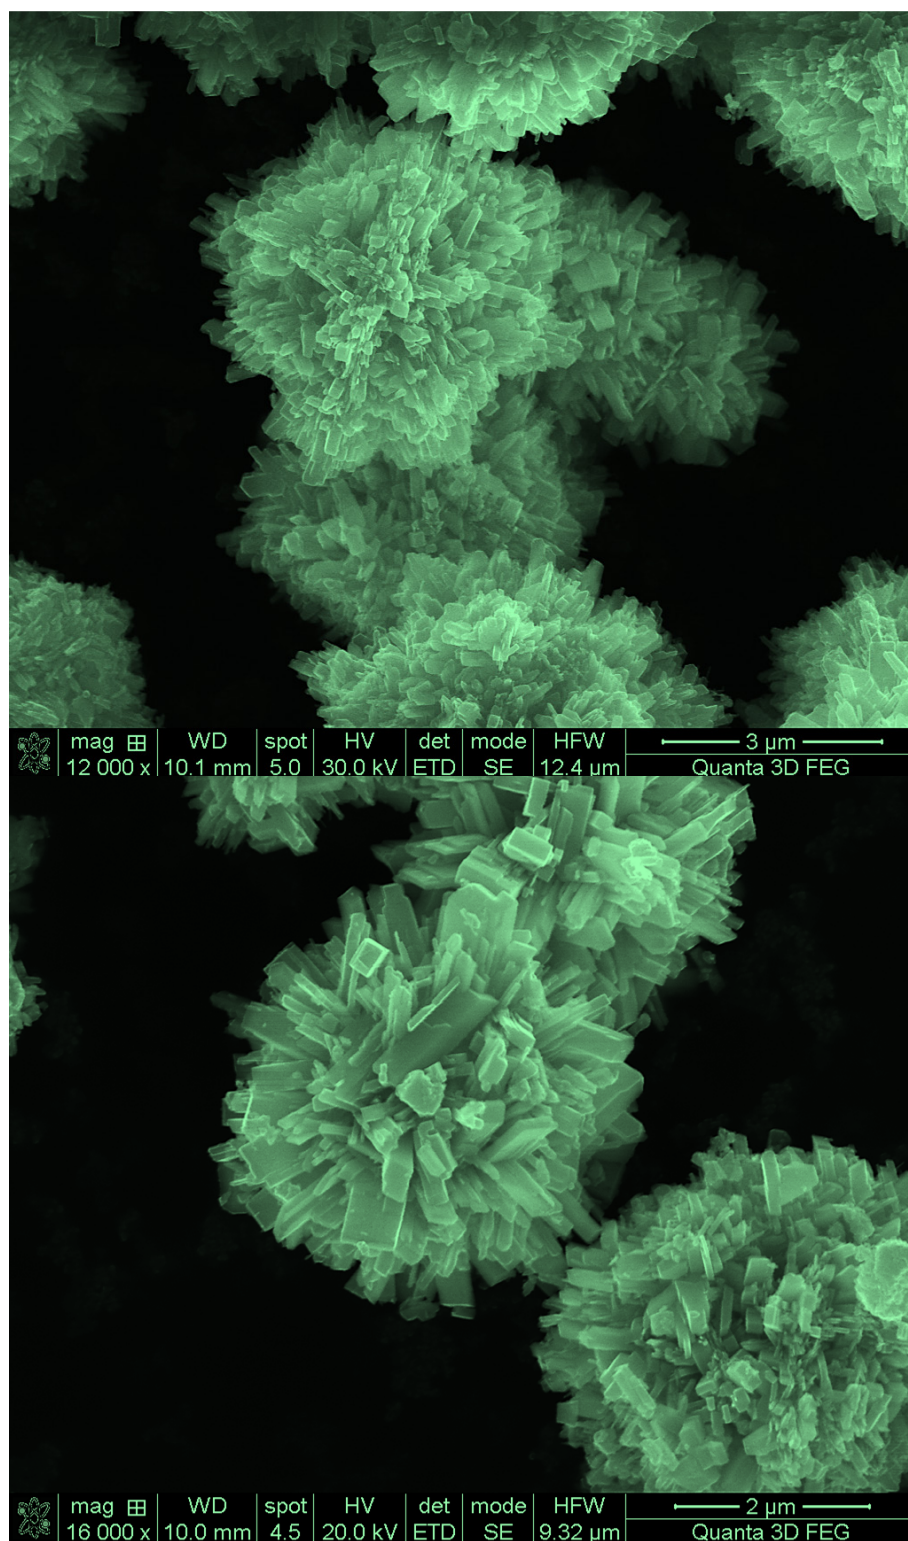

**Figure S8.** SEM micrographs of the flower-like  $\text{WO}_3$ -AMT semiconductors (3–2  $\mu\text{m}$ ).



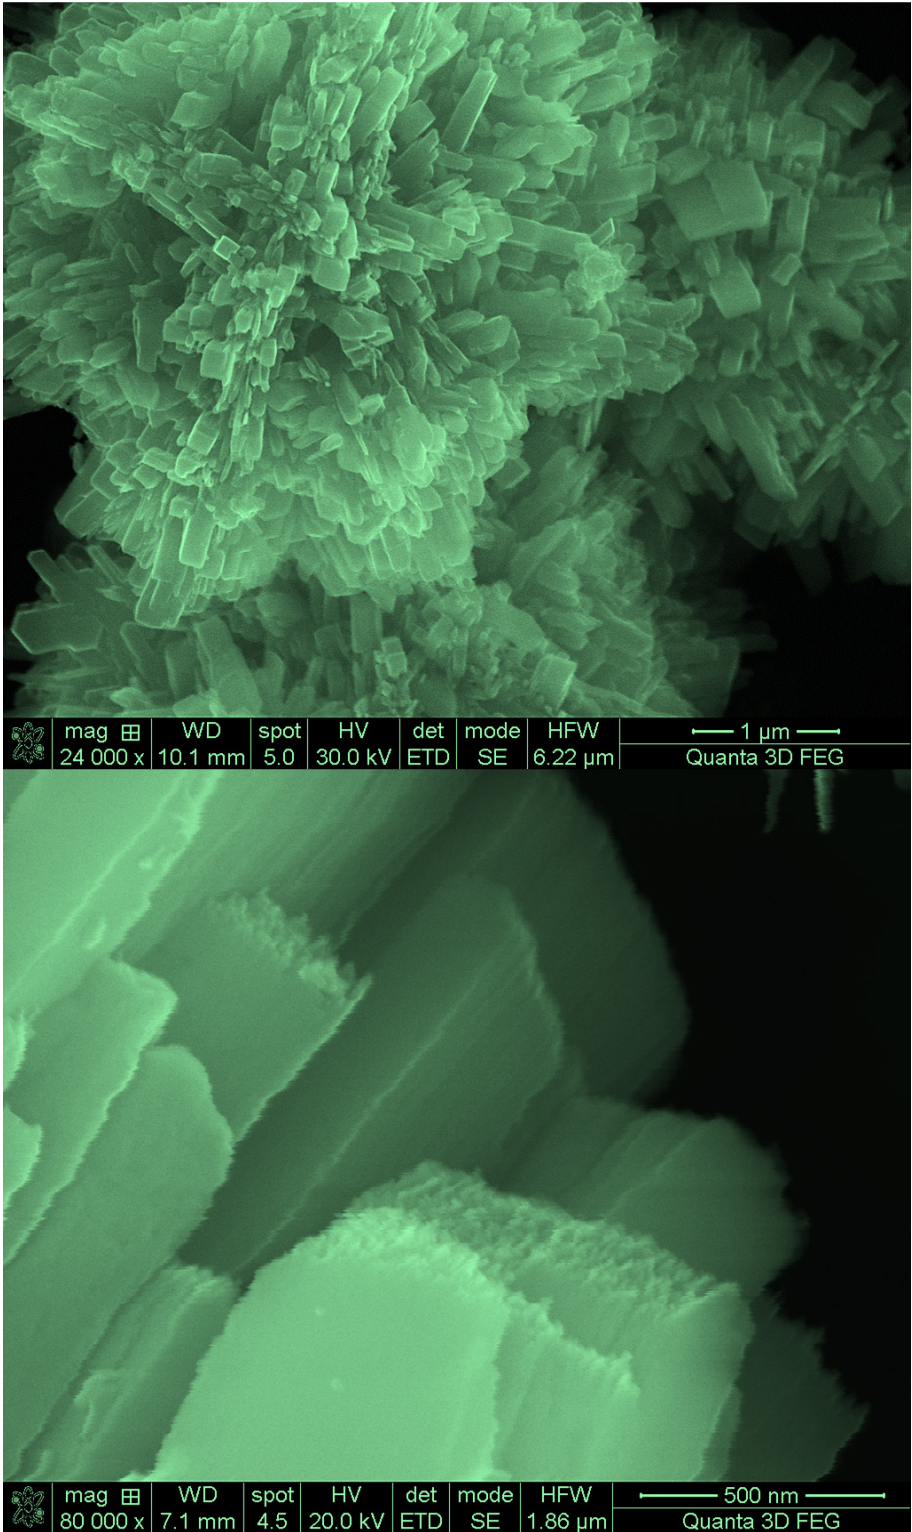

**Figure S9.** SEM micrographs of the flower-like WO<sub>3</sub>-AMT semiconductors (1–0.5 μm).

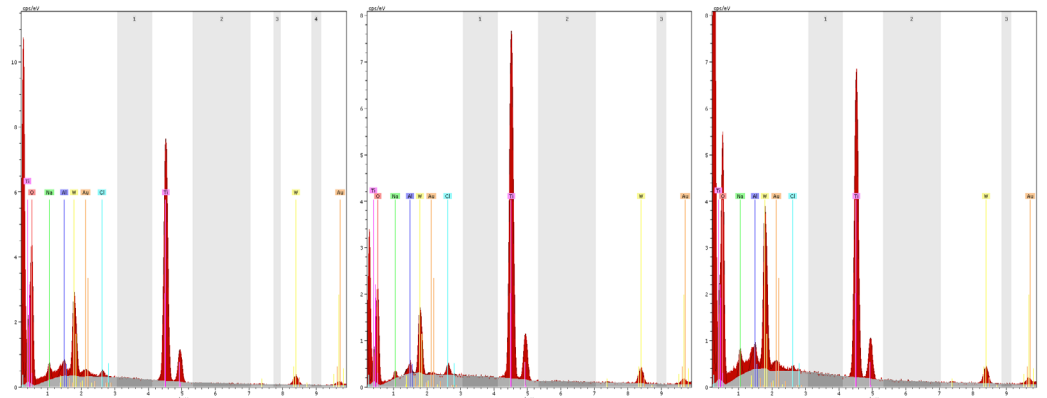

**Figure S10.** SEM-EDX spectra of the Au/TiO<sub>2</sub>/WO<sub>3</sub>-HW-HA heterostructures.

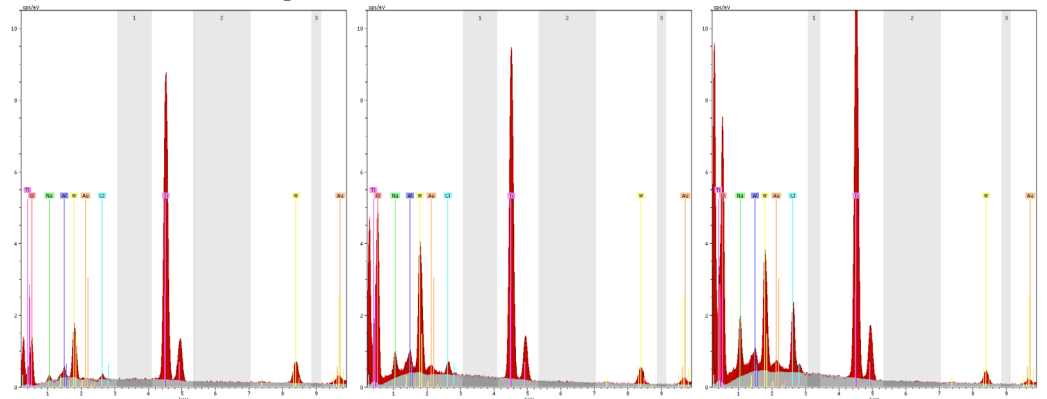

**Figure S11.** SEM-EDX spectra of the Au/TiO<sub>2</sub>/WO<sub>3</sub>-HW-TA heterostructures.

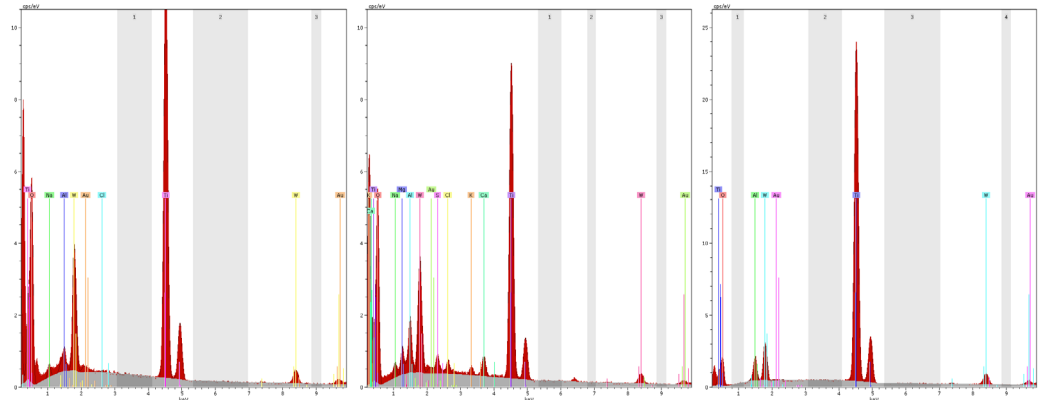

**Figure S12.** SEM-EDX spectra of the Au/TiO<sub>2</sub>/WO<sub>3</sub>-NWH-HA heterostructures.

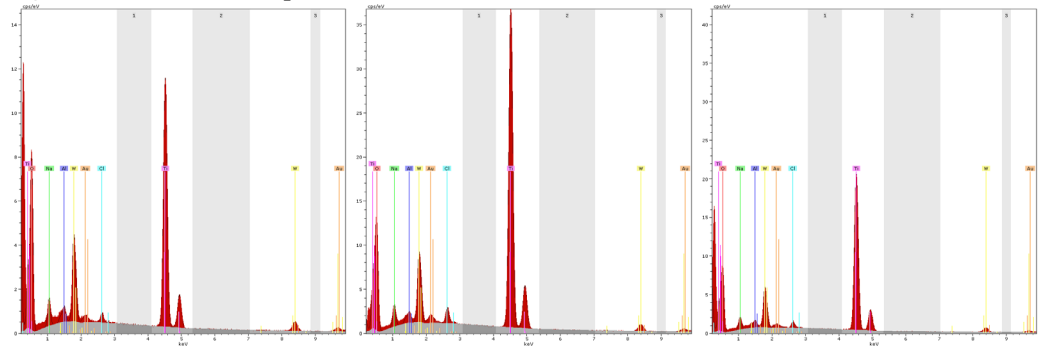

**Figure S13.** SEM-EDX spectra of the Au/TiO<sub>2</sub>/WO<sub>3</sub>-NWH-TA heterostructures.



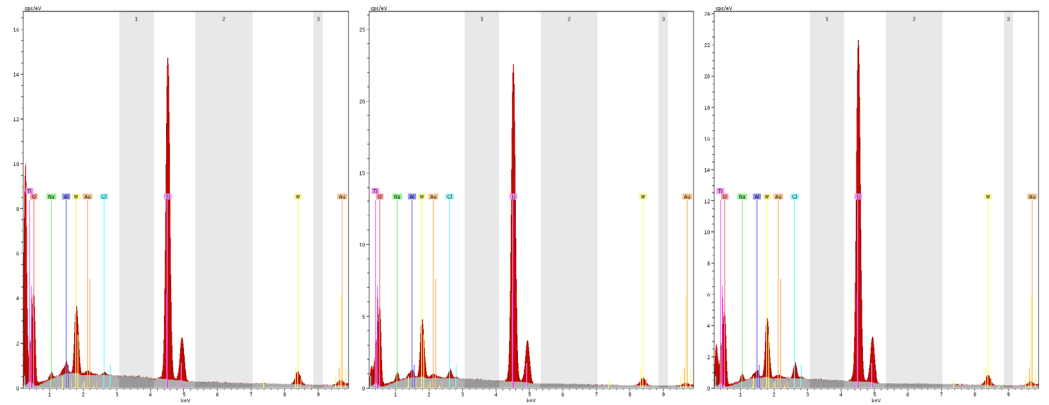

**Figure S14.** SEM-EDX spectra of the Au/TiO<sub>2</sub>/WO<sub>3</sub>-AMT-HA heterostructures.

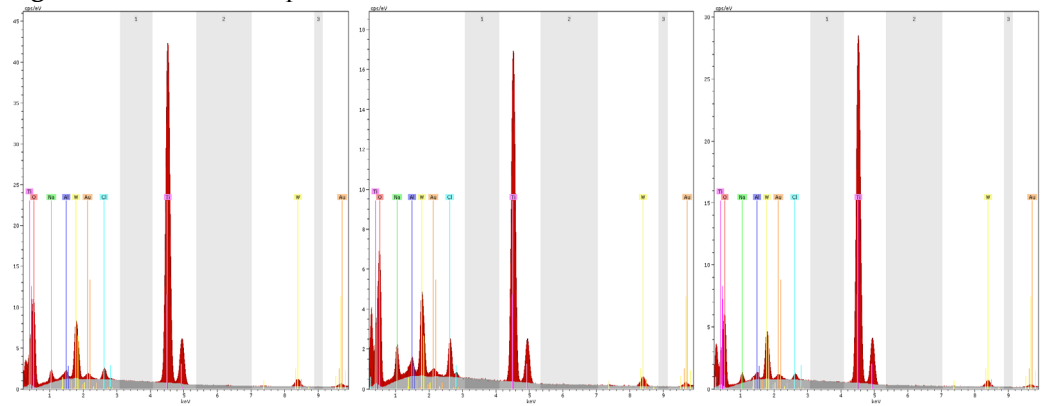

**Figure S15.** SEM-EDX spectra of the Au/TiO<sub>2</sub>/WO<sub>3</sub>-AMT-TA heterostructures.

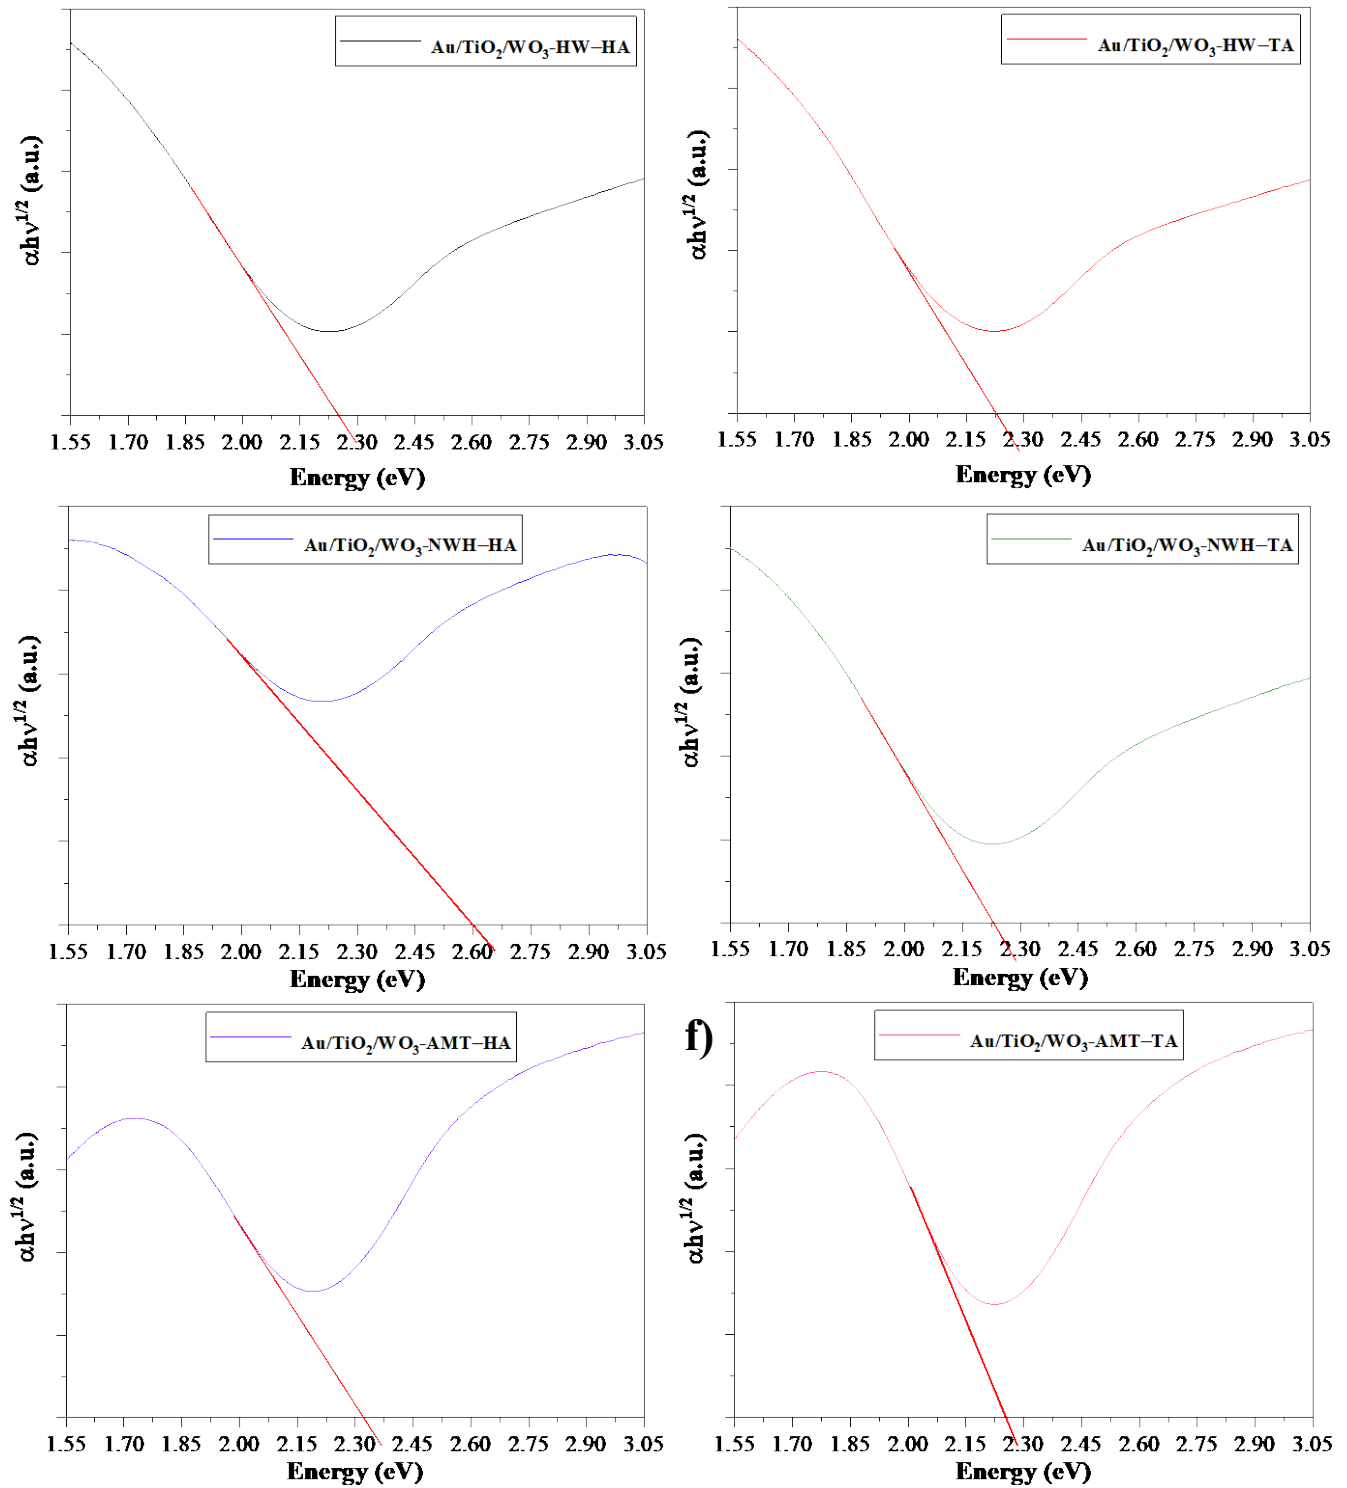

**Figure S16.** Individual Tauc plots of the Au/TiO<sub>2</sub>/WO<sub>3</sub> heterostructures: a) Au/TiO<sub>2</sub>/WO<sub>3</sub>-HW-HA; b) Au/TiO<sub>2</sub>/WO<sub>3</sub>-HW-TA; c) Au/TiO<sub>2</sub>/WO<sub>3</sub>-NWH-HA; d) Au/TiO<sub>2</sub>/WO<sub>3</sub>-NWH-TA, e) Au/TiO<sub>2</sub>/WO<sub>3</sub>-AMT-HA; and f) Au/TiO<sub>2</sub>/WO<sub>3</sub>-AMT-TA.



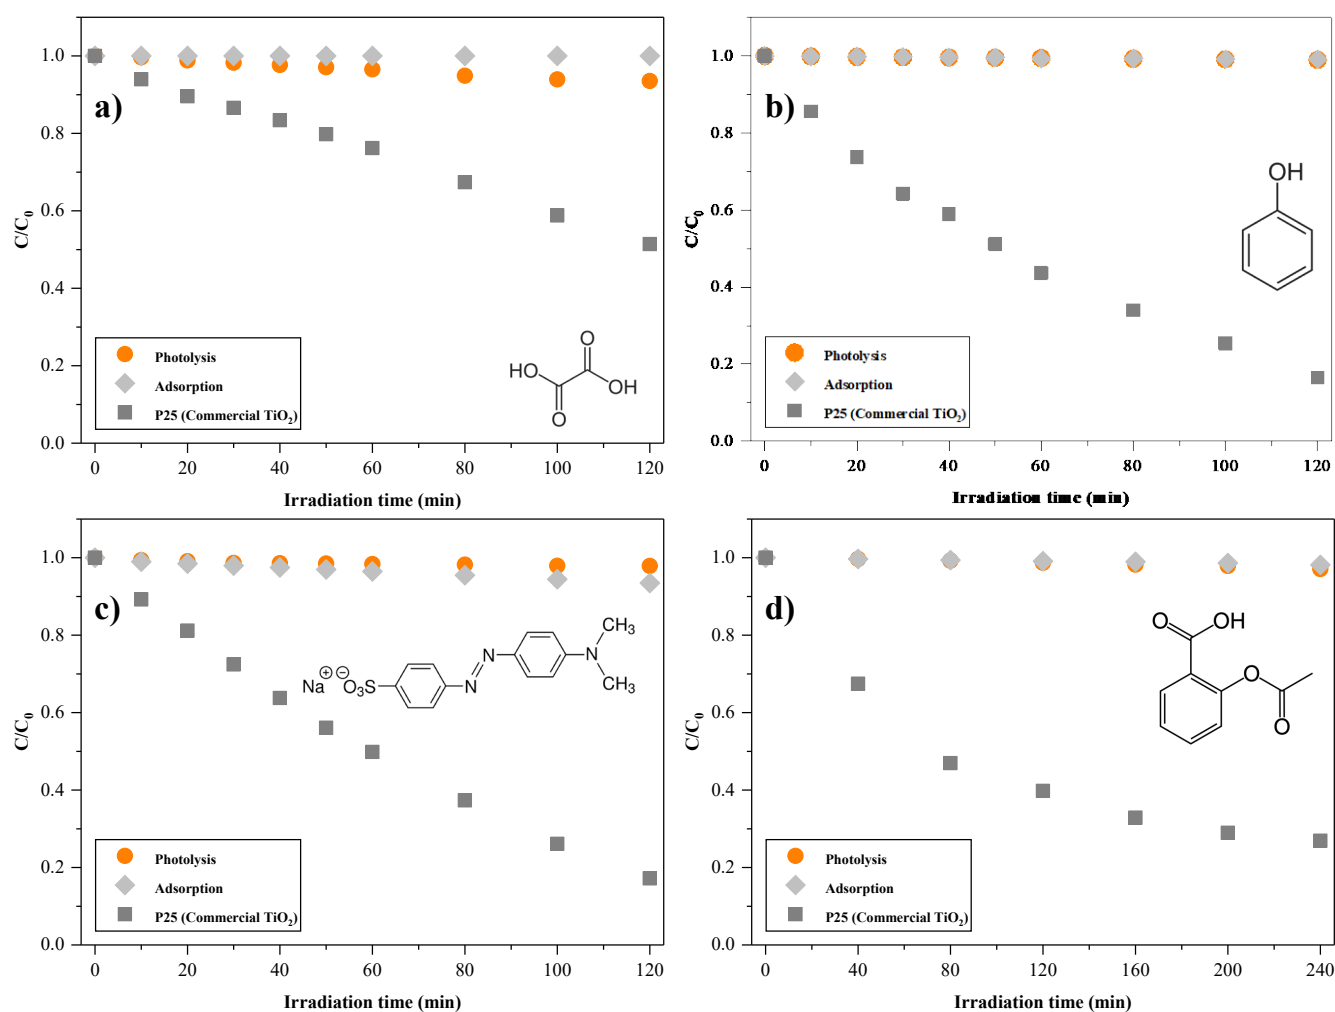

**Figure S17.** Photolysis, adsorption, and photocatalytic activity measurements of commercial  $\text{TiO}_2$  for each model pollutant: a) oxalic acid; b) phenol; c) methyl orange; d) aspirin.

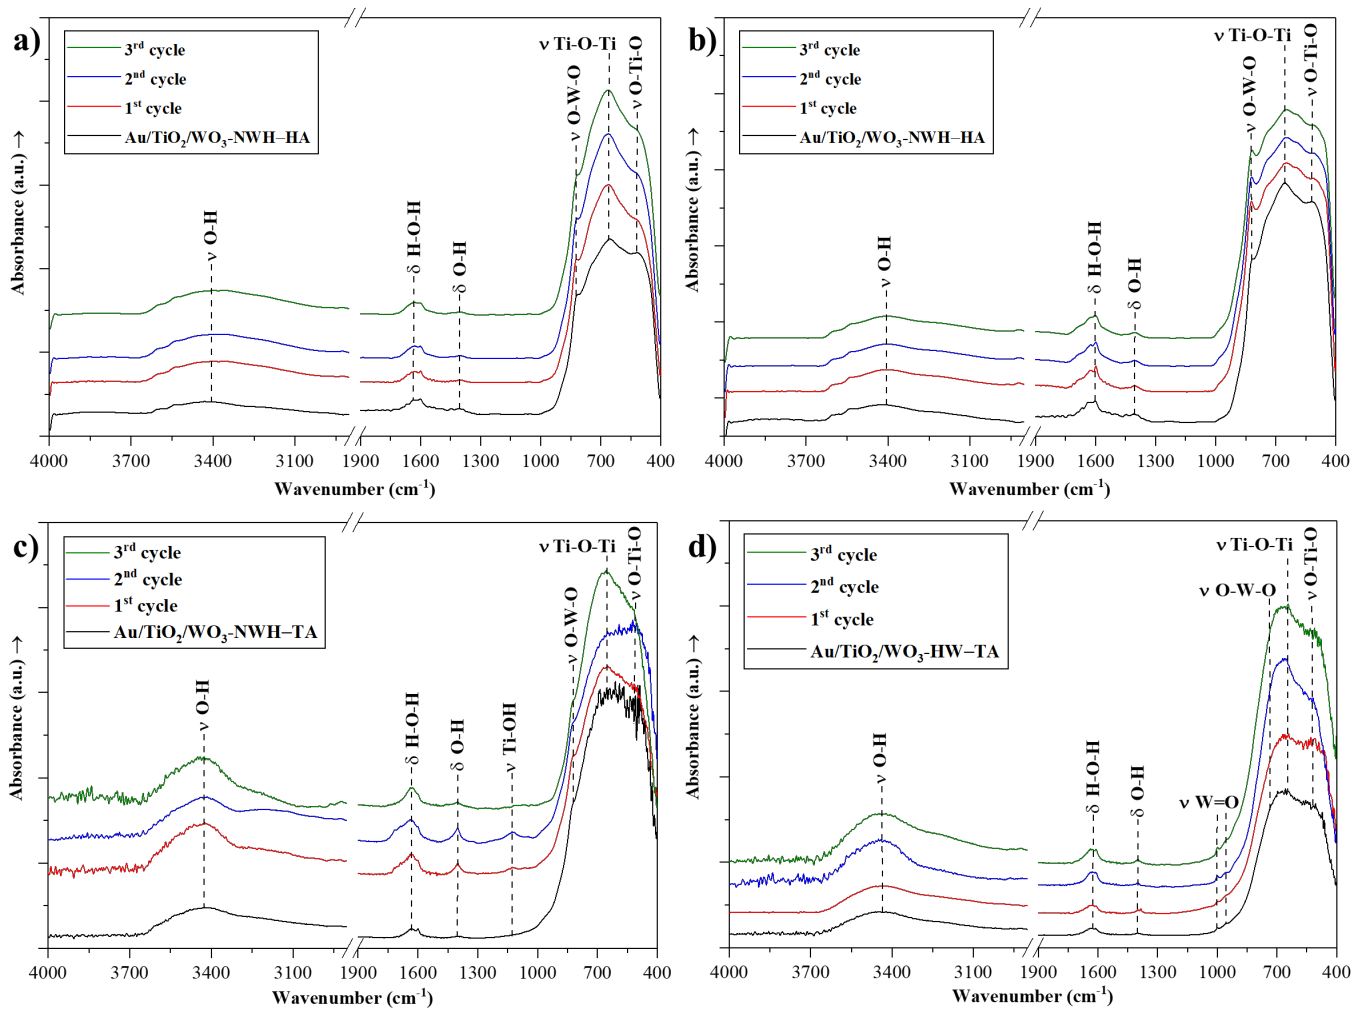

**Figure S18.** Stability of the Au/TiO<sub>2</sub>/WO<sub>3</sub> heterostructures after several cycles of recyclability (after OA removal a); after PHE removal b); after MO removal c); and after ASP removal d).



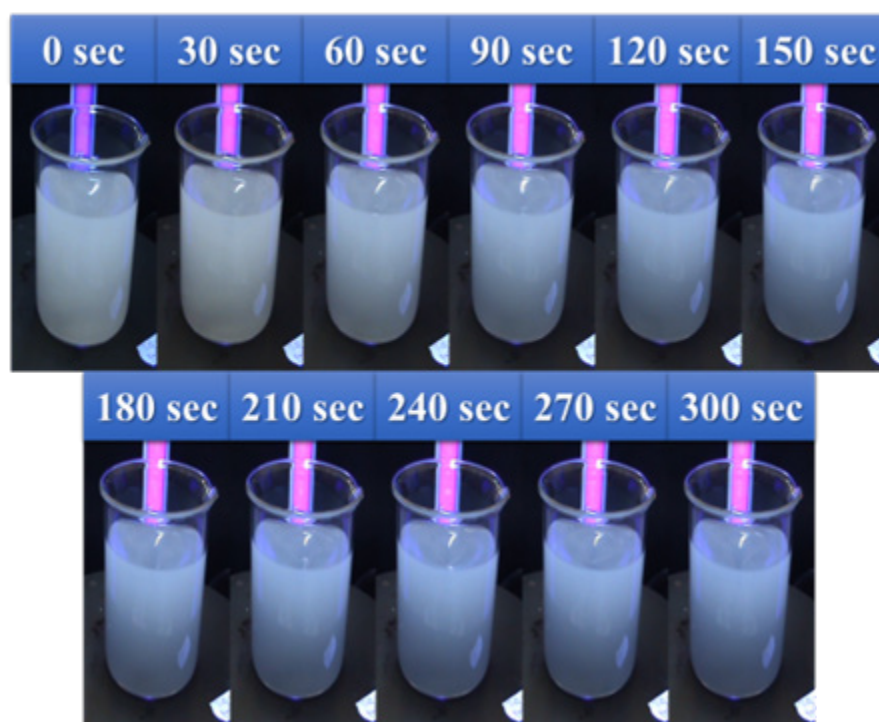

**Figure S19.** Blue colorization of the OA suspension.

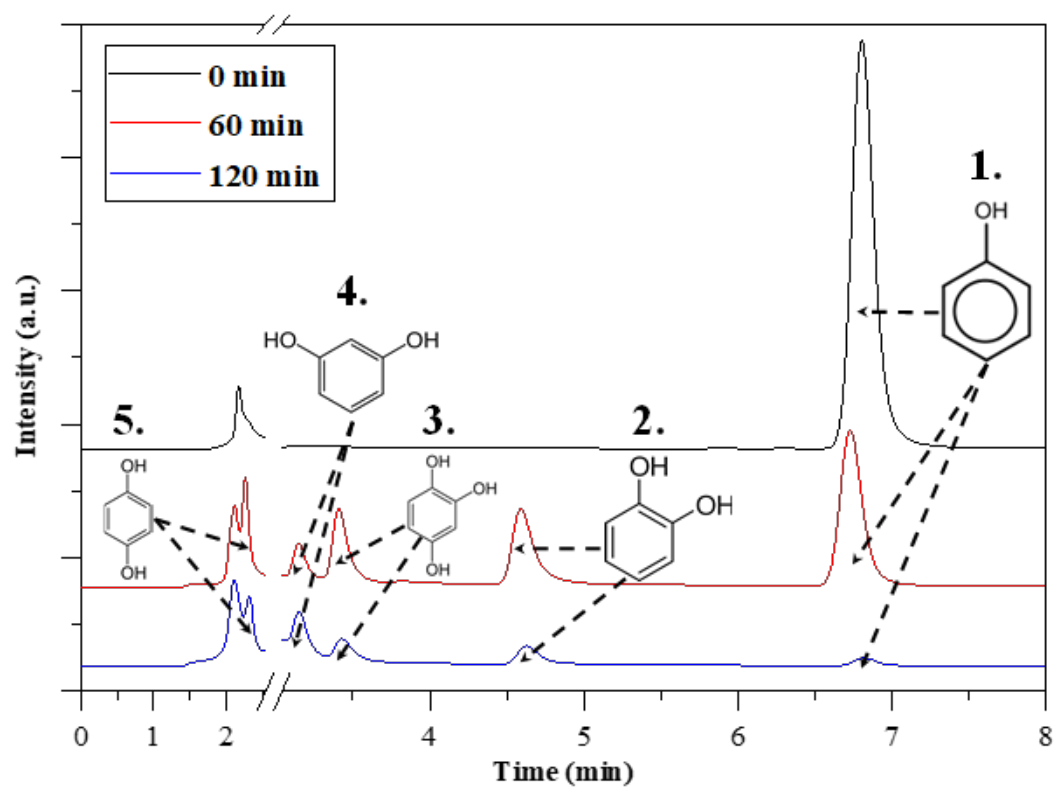

**Figure S20.** Chromatograms of phenol at initial concentration and after 60 and 120 minutes of UV light exposure.

**Table S1.** Summary of the Au/TiO<sub>2</sub>/WO<sub>3</sub> heterostructures' photocatalytic activity under UV and Vis light irradiation.

| Sample                                       | Aspirin<br>conversion (%) | Methyl orange<br>conversion (%) | Phenol<br>conversion (%) | Oxalic acid<br>conversion (%) |
|----------------------------------------------|---------------------------|---------------------------------|--------------------------|-------------------------------|
| Au/TiO <sub>2</sub> /WO <sub>3</sub> -HW-HA  | 72.7                      | 74.9                            | 88.3                     | 67.1                          |
| Au/TiO <sub>2</sub> /WO <sub>3</sub> -HW-TA  | 82.1                      | 56.9                            | 96.8                     | 95.9                          |
| Au/TiO <sub>2</sub> /WO <sub>3</sub> -NWH-HA | 44.0                      | 90.1                            | 99.0                     | 96.6                          |
| Au/TiO <sub>2</sub> /WO <sub>3</sub> -NWH-TA | 64.5                      | 97.9                            | 97.9                     | 62.6                          |
| Au/TiO <sub>2</sub> /WO <sub>3</sub> -AMT-HA | 69.1                      | 48.8                            | 96.3                     | 41.9                          |
| Au/TiO <sub>2</sub> /WO <sub>3</sub> -AMT-TA | 81.6                      | 61.0                            | 98.2                     | 61.9                          |
| P25 (Commercial TiO <sub>2</sub> )           | 73.1                      | 82.8                            | 83.5                     | 48.6                          |
